# Supplementary material for: Surface structure of Pd(111) with less than half a monolayer of Zn
Source: Royal Society of Chemistry journal article supplement (doi:10.1039/c3cp50793a), 2013-01-01
Supplement: c3cp50793a.pdf [file c3cp50793a.pdf]

## Supplementary Information:

### Surface structure of Pd(111) with less than half a monolayer of Zn

J.M. MacLeod,<sup>a,b</sup> J.A. Lipton-Duffin,<sup>a,b</sup> A. Baraldi,<sup>b</sup> R. Rosei<sup>b</sup> and F. Rosei<sup>\*a</sup>

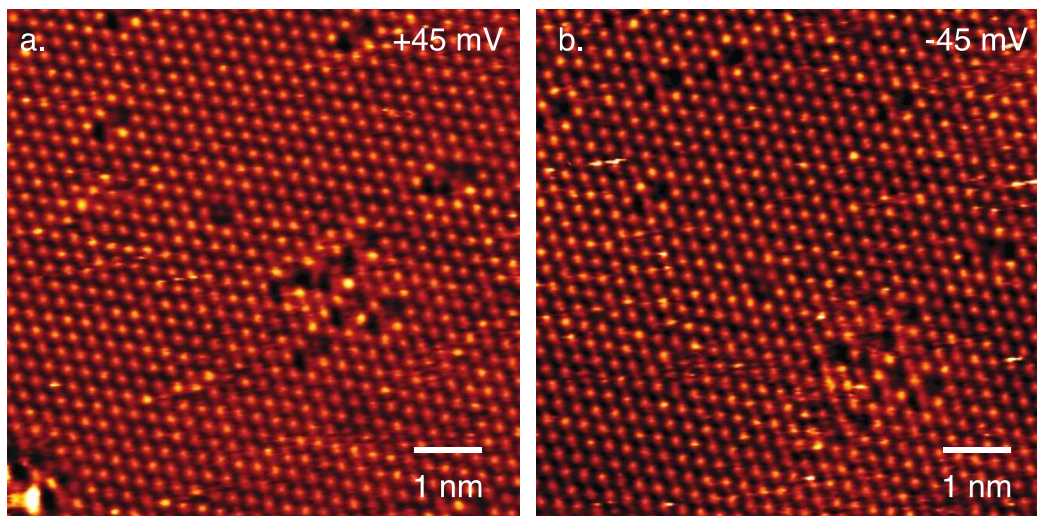

Figure S1. Positive and negative bias images of Pd(111) deposited with  $\approx 0.06$  ML Zn. The bias voltage for each image is indicated in the upper right corner. There is a double tip artefact evident in these images.

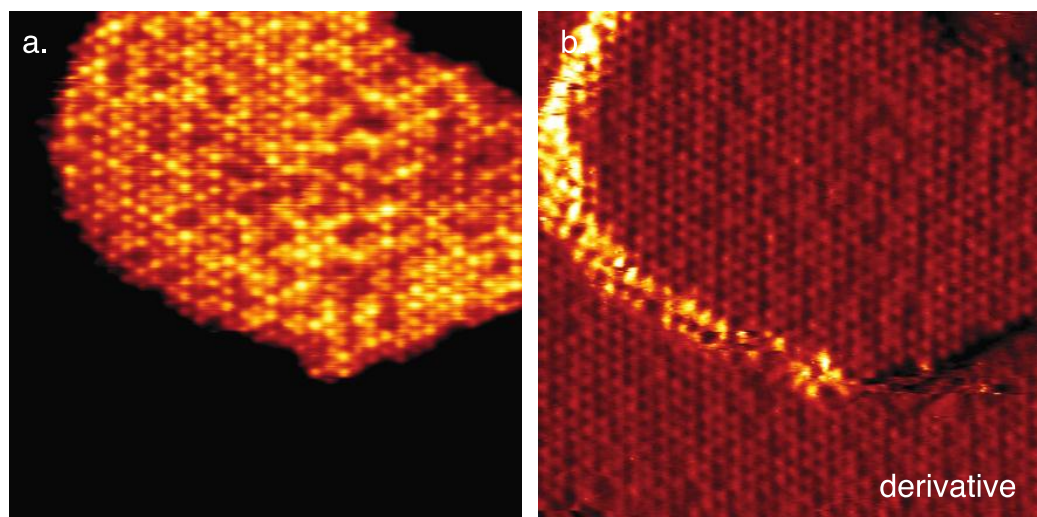

Figure S2. Atomic resolution of an island top on Pd(111) deposited with  $\approx 0.5$  ML of Zn and annealed. (a) shows the raw (uncorrected) image with the contrast adjusted to show the atomic structure of the island top. (b) shows the derivative of that image, where the similarity between the island top and the substrate layer is apparent. The image was acquired at +9 mV bias and has an area of  $\approx 10$  nm  $\times$   $\approx 10$  nm.

#### Notes and references

<sup>a</sup> INRS-EMT, Université du Québec, 1650 Boul. Lionel-Boulet, Varennes, Québec, Canada; E-mail: rosei@emt.inrs.ca

<sup>b</sup> Dipartimento di Fisica, Università degli Studi di Trieste, Via Valerio 2, 34127 Trieste, Italy and IOM-CNR Laboratorio TASC, Area Science Park, S.S.14 Km 163.5, 34149 Trieste, Italy
